# Supplementary material for: HBeAg Levels Vary across the Different Stages of HBV Infection According to the Extent of Immunological Pressure and Are Associated with Therapeutic Outcome in the Setting of Immunosuppression-Driven HBV Reactivation
Source: Biomedicines. 2021 Sep 29;9(10):1352. doi: 10.3390/biomedicines9101352 (PMC8533134; doi:10.3390/biomedicines9101352)
Supplement: Supplementary file 1 [file biomedicines-09-01352-s001.zip › biomedicines-1350277-supplementary.pdf]

# Supplementary Materials

Table S1. Correlation of virological and biochemical parameters

|                   |                    | Correlation of qHBsAg with |              | Correlation of serum HBV-DNA with ALT |
|-------------------|--------------------|----------------------------|--------------|---------------------------------------|
|                   |                    | Serum HBV-DNA              | ALT          |                                       |
| Acute infection   | $\rho^a$           | 0.27                       | <b>-0.63</b> | -0.28                                 |
|                   | $P\text{-value}^a$ | 0.34                       | <b>0.03</b>  | 0.31                                  |
| Chronic infection | $\rho^a$           | <b>0.56</b>                | -0.04        | -0.19                                 |
|                   | $P\text{-value}^a$ | <b>0.01</b>                | 0.89         | 0.44                                  |
| Chronic hepatitis | $\rho^a$           | <b>0.63</b>                | -0.23        | -0.12                                 |
|                   | $P\text{-value}^a$ | <u><b>0.0002</b></u>       | 0.21         | 0.51                                  |
| HBV reactivation  | $\rho^a$           | <b>0.67</b>                | -0.13        | 0.08                                  |
|                   | $P\text{-value}^a$ | <u><b>0.002</b></u>        | 0.64         | 0.74                                  |

<sup>a</sup> Correlations were assessed by Spearman's rho test. Statistically significant correlations are in bold. P-values remaining significant after correction for multiple hypotheses (by Benjamini-Hochberg method at false discovery rate of 5%) are reported as underlined.

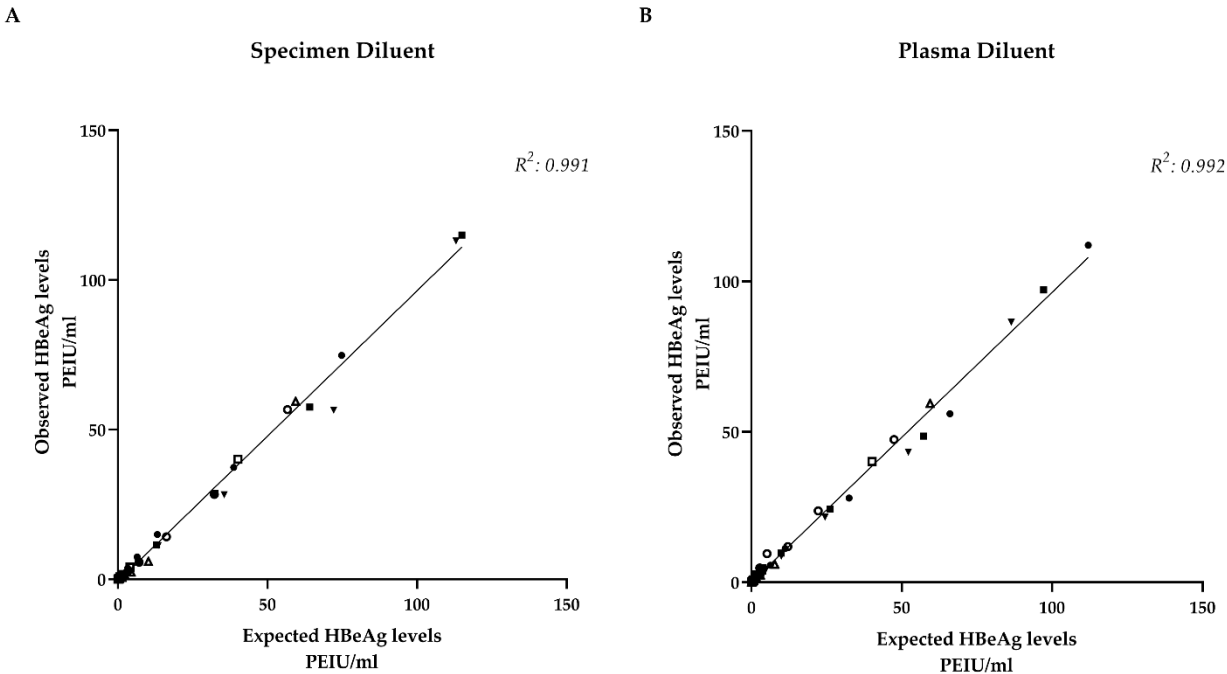

**Figure S1. Linearity of the assay.** The graph in panel A reports the linearity of the assay obtained from serial dilutions of 6 sample made by DiaSorin Specimen Diluent. The panel B shows the serial dilutions of the same samples obtained using plasma from a blood donor.
